# Supplementary material for: Treatment with Angiotensin-(1-7) Prevents Development of Oral Papilloma Induced in K-ras Transgenic Mice
Source: MDPI journal article supplement (doi:10.3390/ijms23073642), 2022-03-26
Supplement: s1 [file s1]

Supplementary Figure S1

A

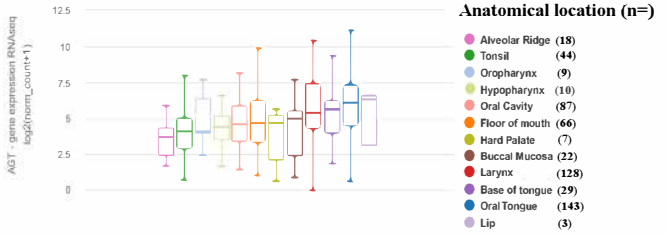

B

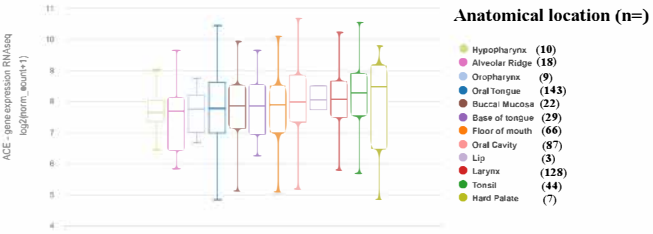

C

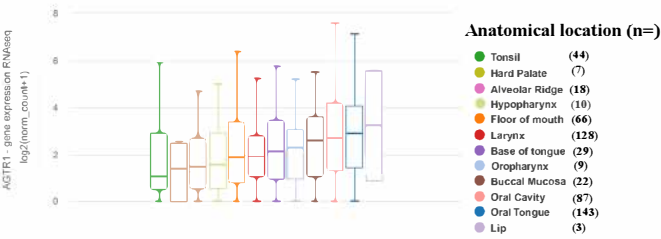

Supplementary Figure S1. Levels of gene expression of members of the classical components of the renin-angiotensin system in head and neck squamous cell carcinoma (HNSCC). Data from the TCGA HNSCC study (21 datasets, n=604 samples, 566 RNA sequenced) was used to investigate the expression of angiotensinogen (*AGT*) (A), *ACE* (B) and angiotensin receptor type 1 *AT1* (*AGTR1*) (C) along distinct anatomic locations of HNSCC. Analyses were performed with the UCSC Xena browser.
